# Supplementary material for: ANGPTL-4 is Associated with Obesity and Lipid Profile in Children and Adolescents
Source: PubMed Central journal article supplement (PMC6628529; doi:10.3390/nu11061340), 2019-06-14
Supplement: nutrients-11-01340-s001.pdf [file nutrients-11-01340-s001.pdf]

**Table S1.** Anthropometric and biochemical characteristics of girls and boys of cross-sectional study.

|                               | Girls               |                     |                  |             | Boys               |                    |                  |             |
|-------------------------------|---------------------|---------------------|------------------|-------------|--------------------|--------------------|------------------|-------------|
|                               | Lean<br>(n= 38)     | Obesity<br>(n= 40)  | <i>P</i>         | <i>Test</i> | Lean<br>(n= 35)    | Obesity<br>(n= 37) | <i>P</i>         | <i>Test</i> |
| Age (yr)                      | 10.3 (3.5)          | 11.8 (3.2)          | 0.06             | \$          | 10.7 (3.4)         | 10.5 (2.8)         | 0.72             | \$          |
| SD                            | 17:21               | 17:23               | 0.84             |             | 17:18              | 21:16              | 0.49             |             |
| Birth weight (kg)             | 3.3 (0.4)           | 3.2 (0.5)           | 0.79             | \$          | 3.2 (0.8)          | 3.3 (0.5)          | 0.74             | \$          |
| <b>Weight (kg)</b>            | <b>41.3 (16.4)</b>  | <b>63.7 (17.8)</b>  | <b>&lt;0.001</b> | <b>\$</b>   | <b>35.9 (13.0)</b> | <b>61.4 (24.0)</b> | <b>&lt;0.001</b> | <b>#</b>    |
| <b>Height (cm)</b>            | <b>141.4 (17.7)</b> | <b>149.7 (14.1)</b> | <b>0.02</b>      | <b>\$</b>   | 140.2 (19.5)       | 146.8 (18.0)       | 0.15             | \$          |
| <b>BMI (kg/m<sup>2</sup>)</b> | <b>19.7 (4.0)</b>   | <b>27.8 (4.4)</b>   | <b>&lt;0.001</b> | <b>\$</b>   | <b>17.5 (2.8)</b>  | <b>27.2 (4.8)</b>  | <b>&lt;0.001</b> | <b>#</b>    |
| <b>WC (cm)</b>                | <b>69.2 (13.8)</b>  | <b>91.8 (11.7)</b>  | <b>&lt;0.001</b> | <b>\$</b>   | <b>65.7 (10.7)</b> | <b>90.4 (15.0)</b> | <b>&lt;0.001</b> | <b>#</b>    |
| <b>Glucose (mg/dl)</b>        | <b>83.9 (8.5)</b>   | <b>77.2 (14.3)</b>  | <b>0.01</b>      | <b>\$</b>   | 83.8 (9.7)         | 81.2 (7.6)         | 0.21             | \$          |
| <b>Insulin (mUI/l)</b>        | <b>8.2 (8.5)</b>    | <b>15.0 (9.6)</b>   | <b>0.003</b>     | <b>\$</b>   | <b>5.1 (3.4)</b>   | <b>12.5 (9.7)</b>  | <b>0.001</b>     | <b>#</b>    |
| <b>HOMA-IR</b>                | <b>1.70 (1.6)</b>   | <b>2.9 (2.0)</b>    | <b>0.01</b>      | <b>\$</b>   | <b>1.1 (0.8)</b>   | <b>2.6 (2.2)</b>   | <b>0.003</b>     | <b>#</b>    |
| IGF-1 (ng/ml)                 | 355.4 (186.1)       | 379.6 (209.3)       | 0.72             | \$          | 250.5 (175.5)      | 265.0 (141.7)      | 0.77             | \$          |
| TG (mg/dl)                    | 59.7 (20.3)         | 65.5 (26.1)         | 0.28             | \$          | 50.3 (26.5)        | 64.9 (37.0)        | 0.06             | \$          |
| FFAs (mg/dl)                  | 11.74 (5.3)         | 10.68 (4.1)         | 0.33             | \$          | 13.1 (5.4)         | 12.1 (3.6)         | 0.40             | \$          |
| TC (mg/dl)                    | 170.1 (32.8)        | 160.2 (23.6)        | 0.19             | #           | 172.2 (40.1)       | 160.8 (38.0)       | 0.22             | \$          |
| LDL-C (mg/dl)                 | 102.0 (27.9)        | 96.5 (27.5)         | 0.41             | \$          | 102.5 (41.6)       | 98.1 (32.3)        | 0.63             | \$          |
| <b>HDL-C (mg/dl)</b>          | <b>56.7 (13.6)</b>  | <b>46.5 (13.0)</b>  | <b>0.002</b>     | <b>\$</b>   | <b>62.3 (13.1)</b> | <b>46.7 (10.9)</b> | <b>&lt;0.001</b> | <b>\$</b>   |
| <b>Leptin (ng/ml)</b>         | <b>13.1 (17.7)</b>  | <b>21.6 (12.7)</b>  | <b>0.02</b>      | <b>\$</b>   | <b>5.2 (5.8)</b>   | <b>14.6 (10.7)</b> | <b>&lt;0.001</b> | <b>#</b>    |
| <b>TSH (mUI/l)</b>            | 2.5 (1.3)           | 2.5 (1.0)           | 0.96             | \$          | <b>2.3 (0.9)</b>   | <b>2.9 (1.3)</b>   | <b>0.04</b>      | <b>#</b>    |
| <b>ft4 (ng/dl)</b>            | 1.1 (0.2)           | 1.2 (0.1)           | 0.40             | #           | <b>1.0 (0.2)</b>   | <b>1.2 (0.1)</b>   | <b>0.02</b>      | <b>#</b>    |
| ft3 (pg/ml)                   | 4.2 (0.4)           | 4.1 (0.4)           | 0.72             | \$          | 4.4 (0.5)          | 4.3 (0.4)          | 0.50             | \$          |
| Es (pg/ml)                    | 45.4 (45.8)         | 36.9 (42.3)         | 0.43             | \$          | 17.3 (14.4)        | 14.1 (8.4)         | 0.27             | \$          |
| T (ng/ml)                     | 0.3 (0.2)           | 0.2 (0.2)           | 0.51             | \$          | 1.1 (1.9)          | 0.7 (0.9)          | 0.32             | #           |
| FSH (UI/l)                    | 3.4 (2.4)           | 4.0 (2.6)           | 0.32             | \$          | 1.5 (1.3)          | 1.8 (1.8)          | 0.87             | #           |
| <b>VD (ng/ml)</b>             | <b>25.0 (13.8)</b>  | <b>16.2 (5.7)</b>   | <b>0.008</b>     | <b>#</b>    | 21.4 (10.5)        | 17.7 (7.4)         | 0.14             | \$          |

Values are presented as mean (SD). Differences in sexual development distribution were analyzed by  $X^2$  analysis. Differences between groups were analyzed by t-test (\$) or Wilcoxon test (#). Bold values indicate significant statistical differences. BMI: body mass index; Es: estradiol; FFAs: free fatty acids; FSH: follicle-stimulating hormone; HDL-C: HDL-cholesterol; HOMA-IR: homeostasis model assessment of insulin resistance; IGF-1: insulin-like growth factor 1; LDL-C: LDL-cholesterol; SD: sexual development (prepuberty:puberty); T: testosterone; TC: total cholesterol; TG: triglycerides; TSH: thyroid-stimulating hormone; ft3: free triiodothyronine; ft4: free thyroxine; VD: vitamin D; WC: waist circumference.

**Table S2.** Anthropometric and biochemical characteristics of children and adolescents subjects of cross-sectional study.

|                               | Children            |                     |                  |             | Adolescents         |                    |                  |             |
|-------------------------------|---------------------|---------------------|------------------|-------------|---------------------|--------------------|------------------|-------------|
|                               | Lean<br>(n= 34)     | Obesity<br>(n= 38)  | <i>P</i>         | <i>Test</i> | Lean<br>(n= 39)     | Obesity<br>(n= 39) | <i>P</i>         | <i>Test</i> |
| Age (yr)                      | 7.7 (2.3)           | 8.7 (2.0)           | 0.04             | \$          | 13.0 (2.1)          | 13.5 (1.8)         | 0.27             | \$          |
| Sex (girls:boys)              | 17:17               | 17:21               | 0.65             |             | 21:18               | 23:16              | 0.65             |             |
| Birth weight (kg)             | 3.1 (0.7)           | 3.3 (0.4)           | 0.41             | \$          | 3.3 (0.4)           | 3.2 (0.6)          | 0.46             | \$          |
| <b>Weight (kg)</b>            | <b>26.3 (9.1)</b>   | <b>46.5 (11.7)</b>  | <b>&lt;0.001</b> | <b>\$</b>   | <b>48.4 (11.1)</b>  | <b>77.6 (15.6)</b> | <b>&lt;0.001</b> | <b>#</b>    |
| <b>Height (cm)</b>            | <b>125.8 (15.5)</b> | <b>135.2 (11.7)</b> | <b>0.007</b>     | <b>\$</b>   | <b>152.7 (10.0)</b> | <b>160.5 (7.5)</b> | <b>&lt;0.001</b> | <b>\$</b>   |
| <b>BMI (kg/m<sup>2</sup>)</b> | <b>16.1 (1.9)</b>   | <b>25.0 (3.3)</b>   | <b>&lt;0.001</b> | <b>\$</b>   | <b>20.6 (3.5)</b>   | <b>29.9 (4.4)</b>  | <b>&lt;0.001</b> | <b>\$</b>   |
| <b>WC (cm)</b>                | <b>58.8 (8.2)</b>   | <b>82.4 (9.8)</b>   | <b>&lt;0.001</b> | <b>\$</b>   | <b>75.0 (10.5)</b>  | <b>99.2 (10.7)</b> | <b>&lt;0.001</b> | <b>\$</b>   |
| <b>Glucose (mg/dl)</b>        | <b>82.4 (8.0)</b>   | <b>76.9 (13.3)</b>  | <b>0.04</b>      | <b>\$</b>   | 85.0 (9.7)          | 81.2 (9.8)         | 0.08             | \$          |
| <b>Insulin (mUI/l)</b>        | <b>4.1 (3.0)</b>    | <b>9.7 (7.9)</b>    | <b>0.001</b>     | <b>#</b>    | <b>9.0 (8.1)</b>    | <b>18.0 (9.6)</b>  | <b>&lt;0.001</b> | <b>#</b>    |
| <b>HOMA-IR</b>                | <b>0.86 (0.7)</b>   | <b>1.9 (1.8)</b>    | <b>0.01</b>      | <b>#</b>    | <b>1.8 (1.5)</b>    | <b>3.6 (2.1)</b>   | <b>&lt;0.001</b> | <b>#</b>    |
| IGF-1 (ng/ml)                 | 167.2 (133.2)       | 221.2 (143.3)       | 0.29             | \$          | 381.3 (165.5)       | 427.3 (173.4)      | 0.37             | \$          |
| TG (mg/dl)                    | 52.9 (26.1)         | 61.0 (30.0)         | 0.24             | \$          | 56.9 (22.0)         | 69.2 (32.8)        | 0.05             | \$          |
| FFAs (mg/dl)                  | 14.1 (6.0)          | 12.7 (3.9)          | 0.26             | \$          | 10.8 (4.3)          | 10.1 (3.5)         | 0.41             | \$          |
| TC (mg/dl)                    | 173.6 (44.9)        | 161.9 (35.7)        | 0.23             | \$          | 169.1 (27.7)        | 159.1 (26.3)       | 0.10             | \$          |
| LDL-C (mg/dl)                 | 106.0 (44.8)        | 100.4 (30.9)        | 0.55             | \$          | 99.1 (24.8)         | 94.3 (28.7)        | 0.45             | \$          |
| <b>HDL-C (mg/dl)</b>          | <b>62.4 (13.6)</b>  | <b>45.5 (10.3)</b>  | <b>&lt;0.001</b> | <b>\$</b>   | <b>57.3 (13.2)</b>  | <b>47.6 (13.5)</b> | <b>0.003</b>     | <b>\$</b>   |
| <b>Leptin (ng/ml)</b>         | <b>3.0 (3.5)</b>    | <b>14.1 (9.0)</b>   | <b>&lt;0.001</b> | <b>#</b>    | <b>13.8 (16.7)</b>  | <b>22.3 (13.7)</b> | <b>0.02</b>      | <b>\$</b>   |
| TSH (mUI/l)                   | 2.5 (1.3)           | 2.6 (1.1)           | 0.54             | \$          | 2.3 (1.0)           | 2.7 (1.2)          | 0.14             | \$          |
| ft4 (ng/dl)                   | 1.1 (0.2)           | 1.2 (0.1)           | 0.07             | #           | 1.1 (0.2)           | 1.1 (0.1)          | 0.20             | #           |
| ft3 (pg/ml)                   | 4.3 (0.5)           | 4.2 (0.3)           | 0.32             | \$          | 4.1 (0.4)           | 4.2 (0.4)          | 0.94             | \$          |
| <b>Es (pg/ml)</b>             | <b>24.7 (24.1)</b>  | <b>14.3 (9.7)</b>   | <b>0.02</b>      | <b>#</b>    | 35.9 (43.0)         | 38.0 (43.0)        | 0.83             | \$          |
| T (ng/ml)                     | 0.2 (0.1)           | 0.2 (0.4)           | 0.86             | \$          | 1.3 (1.9)           | 0.7 (0.8)          | 0.75             | #           |
| <b>FSH (UI/l)</b>             | 1.5 (1.5)           | 1.4 (1.7)           | 0.78             | \$          | <b>3.2 (2.3)</b>    | <b>4.5 (2.3)</b>   | <b>0.02</b>      | <b>\$</b>   |
| <b>VD (ng/ml)</b>             | 22.0 (12.7)         | 19.3 (6.6)          | 0.80             | #           | <b>24.1 (12.3)</b>  | <b>14.5 (5.7)</b>  | <b>&lt;0.001</b> | <b>#</b>    |

Values are presented as mean (SD). Differences in sexual development distribution were analyzed by  $X^2$  analysis. Differences between groups were analyzed by t-test (\$) or Wilcoxon test (#). Bold values indicate significant statistical differences. BMI: body mass index; Es: estradiol; FFAs: free fatty acids; FSH: follicle-stimulating hormone; HDL-C: HDL-cholesterol; HOMA-IR: homeostasis model assessment of insulin resistance; IGF-1: insulin-like growth factor 1; LDL-C: LDL-cholesterol; T: testosterone; TC: total cholesterol; TG: triglycerides; TSH: thyroid-stimulating hormone; ft3: free triiodothyronine; ft4: free thyroxine; VD: vitamin D; WC: waist circumference.

**Table S3.** Specificity study of ELISA kit.

|                 | <b>Sample 1</b> |                | <b>Sample 2</b> |                |
|-----------------|-----------------|----------------|-----------------|----------------|
|                 | Normal PL       | Preadsorbed PL | Normal PL       | Preadsorbed PL |
| <b>ANGPTL-4</b> | 68.89 ng/ml     | < 0.51 ng/ml   | 153.41 ng/ml    | 1.81 ng/ml     |

PL, plasma.

**Table S4.** Relationships of ANGPTL-4 with anthropometric and biochemical parameters measured in the cross-sectional study population.

|                     | ANGPTL4      |              |
|---------------------|--------------|--------------|
|                     | r            | P            |
| Age                 | -0.01        | 0.89         |
| Tanner state        | 0.02         | 0.83         |
| Birth weight        | 0.16         | 0.08         |
| Weight              | <b>-0.19</b> | <b>0.02</b>  |
| Height              | -0.07        | 0.37         |
| BMI                 | <b>-0.27</b> | <b>0.001</b> |
| Waist circumference | <b>-0.25</b> | <b>0.002</b> |
| Glucose             | 0.02         | 0.77         |
| Insulin             | <b>-0.26</b> | <b>0.002</b> |
| HOMA-IR             | <b>-0.27</b> | <b>0.002</b> |
| IGF-1               | -0.07        | 0.49         |
| Triglycerides       | <b>-0.22</b> | <b>0.008</b> |
| Free fatty acids    | <b>0.23</b>  | <b>0.005</b> |
| Total cholesterol   | 0.02         | 0.85         |
| LDL-cholesterol     | -0.00        | 0.93         |
| HDL-cholesterol     | 0.15         | 0.09         |
| Leptin              | <b>-0.19</b> | <b>0.03</b>  |
| TSH                 | -0.03        | 0.71         |
| ft4                 | -0.00        | 0.98         |
| ft3                 | 0.12         | 0.27         |
| Estradiol           | 0.10         | 0.23         |
| Testosterone        | 0.08         | 0.38         |
| FSH                 | -0.03        | 0.75         |
| Vitamin D           | <b>0.24</b>  | <b>0.009</b> |

Statistical significance is from Pearson (normally distributed data) or Spearman (non-normally distributed data) correlation tests. Bold values indicate significant statistical differences. BMI: body mass index; FSH: follicle-stimulating hormone; HOMA-IR: homeostasis model assessment of insulin resistance; IGF-1: insulin-like growth factor 1; TSH: thyroid-stimulating hormone; ft3: free triiodothyronine; ft4: free thyroxine.

**Table S5.** Relationships of ANGPTL-4 with anthropometric and biochemical parameters measured in lean and obese subjects of the cross-sectional study.

|                     | ANGPTL4 |      |              |              |
|---------------------|---------|------|--------------|--------------|
|                     | Lean    |      | Obesity      |              |
|                     | r       | P    | r            | P            |
| Age                 | 0.10    | 0.40 | -0.11        | 0.32         |
| Tanner stage        | 0.21    | 0.09 | -0.07        | 0.57         |
| Birth weight        | 0.21    | 0.11 | 0.10         | 0.45         |
| Weight              | 0.14    | 0.26 | -0.04        | 0.76         |
| Height              | 0.11    | 0.37 | -0.13        | 0.27         |
| BMI                 | 0.13    | 0.29 | -0.05        | 0.65         |
| Waist circumference | 0.14    | 0.26 | -0.00        | 0.96         |
| Glucose             | -0.08   | 0.50 | -0.16        | 0.17         |
| Insulin             | 0.13    | 0.30 | -0.06        | 0.62         |
| HOMA-IR             | 0.09    | 0.47 | -0.09        | 0.44         |
| IGF-1               | -0.04   | 0.84 | -0.07        | 0.56         |
| Triglycerides       | -0.06   | 0.61 | <b>-0.27</b> | <b>0.02</b>  |
| Free fatty acids    | 0.22    | 0.06 | <b>0.34</b>  | <b>0.002</b> |
| Total cholesterol   | 0.09    | 0.47 | <b>-0.25</b> | <b>0.02</b>  |
| LDL-cholesterol     | 0.18    | 0.15 | -0.15        | 0.20         |
| HDL-cholesterol     | -0.02   | 0.88 | -0.21        | 0.07         |
| Leptin              | 0.22    | 0.10 | -0.13        | 0.28         |
| TSH                 | 0.09    | 0.44 | -0.01        | 0.92         |
| fT4                 | 0.23    | 0.08 | -0.10        | 0.41         |
| fT3                 | -0.13   | 0.55 | 0.20         | 0.12         |
| Estradiol           | 0.14    | 0.29 | 0.02         | 0.84         |
| Testosterone        | 0.11    | 0.49 | -0.00        | 0.95         |
| FSH                 | 0.18    | 0.16 | -0.13        | 0.28         |
| Vitamin D           | -0.04   | 0.82 | 0.13         | 0.27         |

Statistical significance is from Pearson (normally distributed data) or Spearman (non-normally distributed data) correlation tests. Bold values mean significant statistical differences. BMI: body mass index; FSH: follicle-stimulating hormone; HOMA-IR: homeostasis model assessment of insulin resistance; IGF-1: insulin-like growth factor 1; TSH: thyroid-stimulating hormone; fT3: free triiodothyronine; fT4: free thyroxine.

**Table S6.** Correlations between the percent change of ANGPTL-4 and the percent change of anthropometric and biochemical characteristics in participants from interventional study.

|                                                | % change of ANGPTL4 |              |
|------------------------------------------------|---------------------|--------------|
|                                                | r                   | P            |
| Percent change of age (%)                      | -0.14               | 0.56         |
| Percent change of weight (%)                   | 0.01                | 0.97         |
| Percent change of height (%)                   | -0.02               | 0.93         |
| Percent change of BMI (%)                      | 0.06                | 0.79         |
| Percent change of fat mass (%)                 | -0.13               | 0.63         |
| Percent change of non fat mass (%)             | -0.00               | 0.98         |
| Percent change of % fat mass (%)               | 0.45                | 0.16         |
| Percent change of waist circumference (%)      | 0.18                | 0.45         |
| Percent change of glucose (%)                  | -0.38               | 0.10         |
| Percent change of insulin (%)                  | -0.08               | 0.78         |
| Percent change of HOMA index (%)               | -0.41               | 0.88         |
| Percent change of IGF-1 (%)                    | 0.00                | 0.99         |
| Percent change of triglycerides (%)            | -0.19               | 0.41         |
| <b>Percent change of free fatty acids (%)</b>  | <b>0.67</b>         | <b>0.001</b> |
| <b>Percent change of total cholesterol (%)</b> | <b>-0.45</b>        | <b>0.04</b>  |
| Percent change of LDL-cholesterol (%)          | -0.25               | 0.28         |
| <b>Percent change of HDL-cholesterol (%)</b>   | <b>-0.51</b>        | <b>0.02</b>  |
| % change of total cholesterol/HDL              | 0.22                | 0.35         |
| % change of LDL/HDL                            | 0.26                | 0.27         |
| Percent change of leptin (%)                   | 0.25                | 0.37         |
| Percent change of TSH (%)                      | 0.15                | 0.54         |
| Percent change of fT4 (%)                      | 0.43                | 0.11         |
| Percent change of fT3 (%)                      | 0.42                | 0.12         |
| Percent change of estradiol (%)                | -0.36               | 0.15         |
| Percent change of testosterone (%)             | 0.37                | 0.21         |
| Percent change of FSH (%)                      | -0.00               | 0.99         |
| Percent change of vitamin D (%)                | -0.22               | 0.35         |

Statistical significance is from Pearson correlation test. Bold values indicate significant statistical differences. BMI: body mass index; FSH: follicle-stimulating hormone; HOMA: homeostasis model assessment of insulin resistance; IGF-1: insulin-like growth factor 1; TSH: thyroid-stimulating hormone; fT3: free triiodothyronine; fT4: free thyroxine.

**Table S7.** Estimated coefficients ( $\beta$ ) of the multivariate linear regression model of longitudinal study, with standard error (SE), t statistic and P values.

|                                            | $\beta$ (SE) | t statistic | P value |
|--------------------------------------------|--------------|-------------|---------|
| <b>Intercept</b>                           | 22.20 (7.93) | 2.80        | 0.01    |
| <b>Percent change of free fatty acids</b>  | 0.16 (0.04)  | 4.35        | 0.001   |
| <b>Percent change of HDL-C</b>             | -0.35 (0.21) | -1.64       | 0.12    |
| <b>Percent change of total cholesterol</b> | -0.43 (0.40) | -1.08       | 0.30    |
| <b>Percent change of triglycerides</b>     | -0.05 (0.06) | -0.89       | 0.39    |

HDL-C: HDL-cholesterol.
